# Supplementary material for: Online Access to Doctors' Notes: Patient Concerns About Privacy
Source: J Med Internet Res. 2013 Sep 26;15(9):e208. doi: 10.2196/jmir.2670 (PMC3785972; doi:10.2196/jmir.2670)
Supplement: Supplementary file 3 [file jmir_v15i9e208_app3.pdf]

**Multimedia Appendix 3. Individual patient matched baseline and post-intervention response to survey question<sup>a</sup>: “I am concerned about my privacy” (N=3,874)**

| Post-Intervention                 |                   |                 |                   |                |                |              |                    |
|-----------------------------------|-------------------|-----------------|-------------------|----------------|----------------|--------------|--------------------|
|                                   |                   | Disagree        | Somewhat disagree | Somewhat agree | Agree          | Don't know   | Total <sup>b</sup> |
| Baseline<br>(Before Intervention) | Disagree          | 1230<br>(66.3%) | 174<br>(9.4%)     | 192<br>(10.4%) | 213<br>(11.5%) | 44<br>(2.4%) | 1853 (100%)        |
|                                   | Somewhat disagree | 213<br>(37.7%)  | 140<br>(24.8%)    | 116<br>(20.5%) | 81<br>(14.3%)  | 15<br>(2.7%) | 565 (100%)         |
|                                   | Somewhat agree    | 271<br>(31.4%)  | 129<br>(15.0%)    | 283<br>(32.8%) | 155<br>(18.0%) | 24<br>(2.8%) | 862 (100%)         |
|                                   | Agree             | 70<br>(16.9%)   | 23<br>(5.6%)      | 113<br>(27.4%) | 199<br>(48.2%) | 8<br>(1.9%)  | 413 (100%)         |
|                                   | Don't know        | 75<br>(41.4%)   | 26<br>(14.4%)     | 39<br>(21.5%)  | 28<br>(15.5%)  | 13<br>(7.2%) | 181 (100%)         |
|                                   | <b>Total</b>      | 1859            | 492               | 743            | 676            | 104          | 3874               |

<sup>a</sup>Baseline question: “If I could read my doctor's notes, I would be concerned about my privacy.”

Post-intervention question: “As a result of reading/having access to my doctor's notes, I am concerned about my privacy.”

<sup>b</sup>Row percents total to 100%
